# Supplementary material for: Integrated bioinformatic analysis reveals the underlying molecular mechanism of and potential drugs for pulmonary arterial hypertension
Source: PubMed Central journal article supplement (PMC8202883; doi:10.18632/aging.203040), 2021-05-18
Supplement: aging-13-203040-s002.pdf [file aging-13-203040-s002.pdf]

## SUPPLEMENTARY TABLE

**Supplementary Table 1. Characteristics of the individual dataset.**

| <b>GEO ID</b> | <b>Platform</b>                              | <b>Tissue type</b> | <b>Sample size</b> | <b>Country</b> | <b>Time</b> |
|---------------|----------------------------------------------|--------------------|--------------------|----------------|-------------|
| GSE113439     | GPL6244 (Affymetrix Human Gene 1.0 ST Array) | human lung tissue  | 15 vs. 11          | Canada         | 2018        |
| GSE53408      | GPL6244 (Affymetrix Human Gene 1.0 ST Array) | human lung tissue  | 12 vs. 11          | Canada         | 2013        |
| GSE117261     | GPL6244 (Affymetrix Human Gene 1.0 ST Array) | human lung tissue  | 58 vs. 25          | United States  | 2018        |
